# Supplementary material for: The Properties of Linezolid, Rifampicin, and Vancomycin, as Well as the Mechanism of Action of Pentamidine, Determine Their Synergy against Gram-Negative Bacteria
Source: MDPI journal article supplement (doi:10.3390/ijms241813812), 2023-09-07
Supplement: s1 [file s1]

## Supplementary Material

### Supplementary tables

**Table S1** Molecular mechanisms of the used clinically isolated colistin-resistant bacteria.

| Strains              | Isolates | MICs of colistin (mg/L) | Colistin-resistant mechanism                   |
|----------------------|----------|-------------------------|------------------------------------------------|
| <i>E. coli</i>       | DC3846   | 8                       | <i>mcr-I</i>                                   |
|                      | DC3539   | 16                      | <i>mcr-I</i>                                   |
|                      | DC5262   | ≥64                     | <i>mcr-I</i>                                   |
|                      | DC7333   | 4                       | <i>mcr-I</i>                                   |
| <i>K. pneumoniae</i> | FK610    | 32                      | MgrB (K2E, F28C)                               |
|                      | FK6663   | 32                      | PmrB (R256G) + <i>mcr-I</i>                    |
|                      | FK1342   | ≥64                     | MgrB (K2E, F28C) + PhoQ (D150G) + <i>mcr-I</i> |
|                      | FK1986   | 16                      | MgrB (K2E, F28C) + PhoQ (D150G)                |

**NOTE:** The MIC value of colistin and colistin-resistant mechanism were determined in our previous work [1].

### Reference

- [1] Zhang, Y.; Lin, Y.; Zhang, X.; Chen, L.; Xu, C.; Liu, S.; Cao, J.; Zheng, X.; Jia, H.; Chen, L.; Zhou, T. Combining Colistin with Furanone C-30 Rescues Colistin Resistance of Gram-Negative Bacteria in Vitro and in Vivo. *Microbiol. Spectr.* **2021**, 9, e0123121.

**Table S2** MICs of tested agents against Gram-negative bacteria.

| Tested agents        |              | PMB         | CCCP | PNT  | LNZ  | RIF | VA   | E    | TET |
|----------------------|--------------|-------------|------|------|------|-----|------|------|-----|
| Species              | Isolates     | MICs (mg/L) |      |      |      |     |      |      |     |
| <i>E. coli</i>       | ATCC25922    | 0.25        | 10   | 256  | >64  | 16  | >128 | 128  | 16  |
|                      | CRDC6581     | 0.25        | 10   | 256  | >64  | 16  | >128 | 128  | 16  |
|                      | Col-RDC3846  | 8           | 10   | 256  | >64  | 16  | >128 | 128  | 128 |
|                      | Col-RDC7333  | 4           | 10   | >512 | >128 | 32  | 128  | >128 | 64  |
|                      | Col-RDC3539  | 16          | 10   | 256  | >128 | 64  | 128  | >128 | 128 |
|                      | Col-RDC5262  | >64         | 10   | 256  | >128 | 64  | >128 | >128 | 128 |
| <i>K. pneumoniae</i> | ATCC700603   | 0.25        | 20   | >512 | >64  | 32  | >128 | 128  | 32  |
|                      | CRFK7921     | 0.25        | 20   | 512  | 512  | 32  | >128 | >128 | 64  |
|                      | Col-RFK6663  | 32          | 20   | 256  | 512  | 64  | >128 | >128 | 64  |
|                      | Col-R FK1986 | 16          | 20   | >512 | >128 | 32  | 128  | >128 | 32  |
|                      | Col-R FK1342 | >64         | 20   | 512  | >128 | 64  | >128 | >128 | 32  |
|                      | Col-R FK610  | 32          | 20   | 512  | >128 | 64  | 128  | >128 | 64  |
| <i>E. cloacae</i>    | CRCG1779     | 0.25        | 20   | 2048 | 1024 | 32  | >128 | >128 | 64  |
| <i>P. aeruginosa</i> | ATCC27853    | 0.25        | 10   | 256  | >64  | 16  | >128 | 128  | 16  |
| <i>A. baumannii</i>  | ATCC19606    | 0.25        | 20   | 512  | 1024 | 16  | >128 | 128  | 64  |

**Abbreviations:** PMB, polymixin B; CCCP, carbonyl cyanide m-chlorophenylhydrazone; PNT, pentamidine; LNZ, linezolid; RIF, rifampicin; VA, vancomycin; E, erythromycin; TET, tetracycline. CR, Carbapenem-resistant; Col-R, Colistin-resistant.
